# Supplementary material for: Social Jetlag and Prostate Cancer Incidence in Alberta’s Tomorrow Project: A Prospective Cohort Study
Source: MDPI journal article supplement (doi:10.3390/cancers12123873), 2020-12-21
Supplement: s1 [file s1]

# Supplementary Material: Social Jetlag and Prostate Cancer Incidence in Alberta's Tomorrow Project: A Prospective Cohort Study

Liang Hu, Andrew Harper, Emily Heer, Jessica McNeil, Chao Cao, Yikyung Park, Kevin Martell, Geoffrey Gotto, Grace Shen-Tu, Cheryl Peters, Darren Brenner and Lin Yang

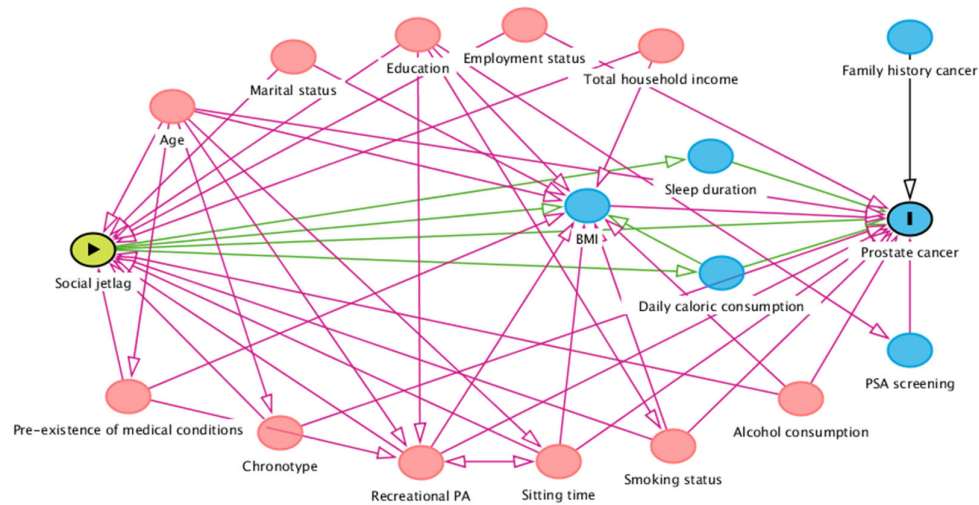

**Figure S1.** The directed acyclic graph (DAG) to identify potential confounders a priori in the prospective association between social jetlag and prostate cancer incidence in the Alberta's Tomorrow Project.

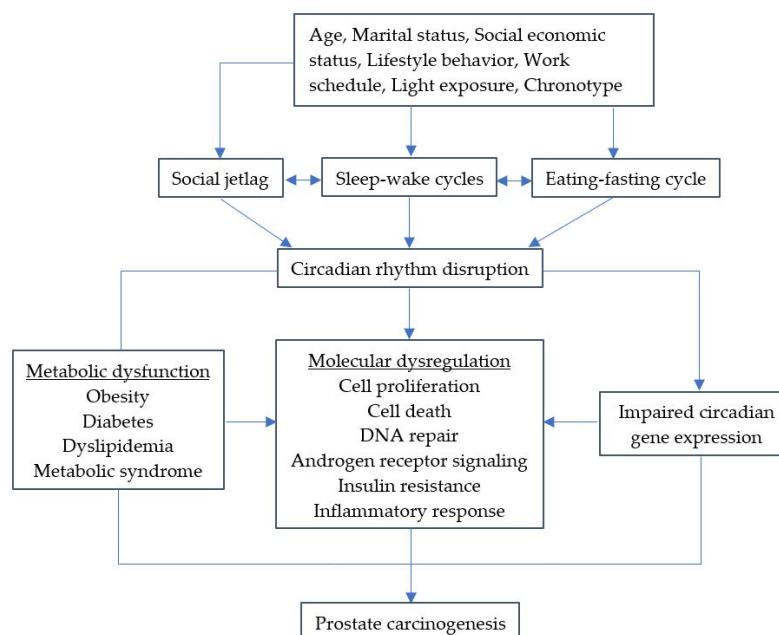

**Figure S2.** Hypothesized pathway through which social jetlag associated sleep-wake cycle disruption may influence prostate cancer risk.
